# Supplementary material for: Antibiotic Resistance and Virulence of Extraintestinal Pathogenic Escherichia coli (ExPEC) Vary According to Molecular Types
Source: Front Microbiol. 2020 Nov 25;11:598305. doi: 10.3389/fmicb.2020.598305 (PMC7732638; doi:10.3389/fmicb.2020.598305)
Supplement: Supplementary file 1 [file Data_Sheet_1.xlsx]

## Sheet: Table S1
TABLE S1 Major clonal groups among these ExPEC isolates.
Major molecular type	Total no. of strains (n = 411)	No. of sequenced strains (n = 74)	Sequenced strains	Sources	Resistance rate (Rank)a	CH Typeb	ST Typec	CH-ST correspondenced	Phylogenetic groupe
CH14-64	n = 43	n = 11, LSQ01-11	LSQ09	Urine	5.6 (1/43)	14-64	1193	CH14-64 to ST1193 (1CH to 1ST)	B2
			LSQ01	Urine	11.8 (5/43)	14-64	1193		B2
			LSQ08	Urine	16.7 (9/43)	14-64	1193		B2
			LSQ06	Urine	16.7 (14/43)	14-64	1193		B2
			LSQ04	Urine	30 (18/43)	14-64	1193		B2
			LSQ05	Urine	35.7 (22/43)	14-64	1193		B2
			LSQ02	Urine	46.7 (26/43)	14-64	1193		B2
			LSQ03	Urine	55.6 (30/43)	14-64	1193		B2
			LSQ10	Throat swab	60.9 (35/43)	14-64	1193		B2
			LSQ11	Blood	66.7 (39/43)	14-64	1193		B2
			LSQ07	Urine	88.9 (43/43)	14-64	1193		B2
CH40-30	n = 40	n = 9, LSQ12-20	LSQ16	Urine	33.3 (4/40)	40-30	131	1CH to > 1ST	B2
			LSQ12	Urine	47.1 (9/40)	40-30	131		B2
			LSQ15	Urine	50 (13/40)	40-30	131		B2
			LSQ13	Sputum	57.1 (18/40)	40-30	131		B2
			LSQ18	Urine	60.9 (22/40)	40-30	131		B2
			LSQ14	Urine	65.2 (27/40)	40-30	131		B2
			LSQ20	Drainage	66.7 (31/40)	40-30	131		B2
			LSQ19	Throat swab	69.6 (35/40)	40-30	131		B2
			LSQ17	Urine	100 (40/40)	40-30	131		B2
CH35-27	n = 23	n = 6, LSQ21-26	LSQ21	Urine	0 (1/23)	35-27	69	1CH to > 1ST	D
			LSQ24	Urine	8.7 (5/23)	35-27	69		D
			LSQ22	Urine	18.8 (10/23)	35-27	69		D
			LSQ23	Urine	35.3 (14/23)	35-27	69		D
			LSQ25	Urine	47.1 (19/23)	35-27	69		D
			LSQ26	Urine	66.7 (23/23)	35-27	69		D
CH37-27	n = 17	n = 4, LSQ27-30	LSQ27	Urine	33.3 (1/17)	37-27	405	CH37-27 to ST405 (1CH to 1ST)	D
			LSQ30	Blood	56.5 (6/17)	37-27	405		D
			LSQ29	Urine	69.6 (12/17)	37-27	405		D
			LSQ28	Urine	82.6 (17/17)	37-27	405		D
CH11-54	n = 18	n = 7, LSQ31-37	LSQ37	Rectal discharge	0 (1/18)	11-54	8125	1CH to > 1ST	A
			LSQ35	Throat swab	4.8 (3/18)	11-54	48		A
			LSQ32	Urine	27.8 (6/18)	11-54	209		A
			LSQ34	Urine	33.3 (7/18)	11-54	10		A
			LSQ31	Urine	56.3 (9/18)	11-54	10		A
			LSQ36	Blood	61.9 (13/18)	11-54	48		A
			LSQ33	Urine	100 (18/18)	11-54	44		A
CH40-41	n = 16	n = 4, LSQ38-41	LSQ39	Urine	0 (1/16)	40-41	131	CH40-41 to ST131 (1CH to 1ST)	B2
			LSQ38	Urine	45.5 (6/16)	40-41	131		B2
			LSQ40	Urine	63.6 (11/16)	40-41	131		B2
			LSQ41	Blood	77.3 (16/16)	40-41	131		B2
CH26-5	n = 13	n = 3, LSQ42-44	LSQ43	Urine	6.7 (1/13)	26-5	38	CH26-5 to ST38 (1CH to 1ST)	D
			LSQ44	Throat swab	34.8 (7/13)	26-5	38		D
			LSQ42	Urine	53.3 (13/13)	26-5	38		D
CH26-65	n = 12	n = 2, LSQ45-46	LSQ45	Urine	0 (1/12)	26-65	1177	1CH to > 1ST	D
			LSQ46	Blood	76.9 (12/12)	26-65	38		D
CH38-27	n = 12	n = 3, LSQ47-49	LSQ49	Throat swab	4.8 (1/13)	38-27	95	1CH to > 1ST	B2
			LSQ47	Blood	42.9 (7/13)	38-27	95		B2
			LSQ48	Urine	77.8 (13/13)	38-27	95		B2
ST648	n = 11	n = 3, LSQ50-52	LSQ52	Urine	13.3 (1/11)	-	648	NA (not applicable)	F
			LSQ50	Urine	42.9 (6/11)	-	648		F
			LSQ51	Urine	88.9 (11/11)	-	648		F
CH13-5	n = 10	n = 3, LSQ53-55	LSQ53	Sputum	34.8 (1/11)	13-5	12	1CH to > 1ST	B2
			LSQ54	Sputum	43.5 (6/11)	13-5	12		B2
			LSQ55	Sputum	47.8 (11/11)	13-5	12		B2
Othersf	n = 196	n = 19, LSQ56-74	LSQ60	Urine	0 (1/196)	11-25	10	NA	A
			LSQ57	Sputum	0 (11/196)	24-10	73		B2
			LSQ70	Throat swab	0 (22/196)	67-222	174		F
			LSQ69	Urine	5.6 (32/196)	33-44	62		F
			LSQ71	Throat swab	9.5 (42/196)	11-27	10		A
			LSQ58	Sputum	17.4 (53/196)	-	450		A
			LSQ66	Urine	21.7 (63/196)	6-31	1196		B1
			LSQ59	Sputum	37.5 (82/196)	4-32	155		B1
			LSQ74	Blood	41.2 (92/196)	4-61	224		B1
			LSQ56	Urine	46.7 (103/196)	14-4	127		B2
			LSQ62	Urine	52.2 (113/196)	37-263	405		D
			LSQ67	Urine	52.2 (114/196)	11-27	10		A
			LSQ63	Urine	60.9 (134/196)	184-108	1266		E
			LSQ73	Wound secretion	62.5 (144/196)	29-38	156		B1
			LSQ68	Urine	69.6 (154/196)	4-24	410		C
			LSQ64	Urine	72.7 (165/196)	4-32	155		B1
			LSQ72	Rectal discharge	76.2 (175/196)	37-29	405		D
			LSQ65	Urine	83.3 (185/196)	106-54	393		D
			LSQ61	Urine	100 (196/196)	4-27	648		F
aApart from 7, 2, and 19 isolates respectively in CH11-54, CH26-65, and “Others” group, about one-quarter of the isolates in each group were also sampled equidistantly between the lowest and highest resistance rates in each group.
bThe two (fumC and fimH) genes were amplified for all isolates by PCR. The amplified products were sequenced, and the results were analyzed by a Web tool for CH typing (CHTyper 1.0, https://cge.cbs.dtu.dk/services/chtyper/). ‘-’ indicated fimH-null isolates (isolates without fimH).
cSTs of the strains were analyzed from raw reads using MLST v 2.0 (Larsen et al., 2012), with results reported for thresholds of 100% nucleotide identity, 100% coverage of the query, and a sequence depth of > 50×.
dThe unique ST from the specific CH type was inferred according to a CH-ST correspondence table from previous studies and NCBI Assembly database (2016.08.16) (Matsumura et al., 2017).
eRaw reads were assembled into scaffolds using SPAdes v 3.13.1 (Nurk et al., 2013). The major ExPEC phylogenetic group (A, B1, B2, C, D, E, and F) was determined by analyzing the assembled scaffolds using the online service ClermonTyping (http://clermontyping.iame-research.center/).
fOther isolates (196) include CH11-27 (9); CH4-24 and CH24-10 (8 each); CH4-27 and CH65-32 (7 each); CH4-58 (6); CH4-32 (5); CH4-35, CH4-54, CH4-61, CH11-34, CH88-145, ST167, and ST773 (4 each); CH4-29, CH7-34, CH24-30, CH29-38, CH33-44, CH40-20, and CH41-86 (3 each); CH6-35, CH7-41, CH11-23, CH11-24, CH11-30, CH13-41, CH19-86, CH19-87, CH23-31, CH37-29, CH38-5, CH40-22, CH106-54, CH165-27, and S…

## Sheet: Table S2
TABLE S2 Acquired antibiotic resistance genes (ARG) in the 74 strains.
Strain	Aminoglycoside																Beta-lactam													Fosfomycin	Macrolide			Phenicol						Quinolone					Rifampicin	Sulphonamide			Tetracycline
	aac						aadA					ant(3'')-Ia	aph			rmtB	blaCMY-2	blaCTX-M									blaOXA-1	blaTEM		fosA3	ermB	mdfA	mphA	cat			cml		floR	aac(6')-Ib-cr	oqx		qepA1	qnrS1	arr-3	sul			tet
	aac(3)-IIa	aac(3)-IId	aac(3)-IIe	aac(6')-Ib	aac(6')-Ib3	aac(6')-Ib-cr	aadA1	aadA2	aadA3	aadA5	aadA16		aph(3')-Ia	aph(3'')-Ib	aph(6)-Id			blaCTX-M-3	blaCTX-M-14	blaCTX-M-15	blaCTX-M-27	blaCTX-M-55	blaCTX-M-64	blaCTX-M-65	blaCTX-M-104	blaCTX-M-197		blaTEM-1B	blaTEM-102					catA1	catA2	catB3	cml	cmlA1			oqxA	oqxB				sul1	sul2	sul3	tetA
CH14-64 (n = 11)
LSQ01	-a	+	-	-	-	-	-	-	-	-	-	-	-	-	-	-	-	-	-	-	-	-	-	-	-	-	-	+	-	-	-	+	-	-	-	-	-	-	-	-	-	-	-	-	-	-	-	-	-
LSQ02	-	+	-	-	-	-	-	-	-	-	-	-	-	-	-	-	-	-	-	-	-	+	-	-	-	-	-	+	-	-	-	+	-	-	-	-	-	-	-	-	-	-	-	-	-	-	-	-	-
LSQ03	-	-	-	-	-	-	-	-	-	+	-	-	-	+	+	-	-	-	-	-	+	-	-	-	-	-	-	-	-	-	-	+	+	-	-	-	-	-	-	-	-	-	-	-	-	+	+	-	+
LSQ04	-	-	-	-	-	-	-	-	-	-	-	-	-	-	-	-	-	-	-	-	-	-	-	-	-	-	-	+	-	-	-	+	-	-	-	-	-	-	-	-	-	-	-	-	-	-	-	-	-
LSQ05	-	-	-	-	-	-	-	-	-	+	-	-	-	+	+	-	-	-	-	-	+	-	-	-	-	-	-	-	-	-	-	+	+	-	-	-	-	-	-	-	-	-	-	-	-	+	+	-	+
LSQ06	-	-	-	-	-	-	-	-	-	-	-	-	-	-	-	-	-	-	-	-	-	-	-	-	-	-	-	-	-	-	-	+	-	-	-	-	-	-	-	-	-	-	-	-	-	-	-	-	-
LSQ07	-	-	-	-	-	-	-	-	-	-	-	-	-	+	+	-	-	-	+	-	-	-	-	-	-	-	-	+	-	-	-	+	+	-	-	-	-	-	-	-	-	-	-	-	-	-	+	-	-
LSQ08	-	-	-	-	-	-	-	-	-	-	-	-	-	-	-	-	-	-	-	-	-	-	-	-	-	-	-	-	-	-	-	+	-	-	-	-	-	-	-	-	-	-	-	-	-	-	-	-	-
LSQ09	-	-	-	-	-	-	-	-	-	-	-	-	-	-	-	-	-	-	-	-	-	-	-	-	-	-	-	-	-	-	-	+	-	-	-	-	-	-	-	-	-	-	-	-	-	-	-	-	-
LSQ10	-	-	-	-	-	-	-	-	-	-	-	-	-	+	+	-	-	-	-	-	-	+	-	-	-	-	-	-	-	-	-	+	-	-	-	-	-	-	-	-	-	-	-	-	-	-	+	-	-
LSQ11	-	+	-	-	-	-	-	-	-	+	-	-	-	+	+	-	-	-	-	-	-	+	-	-	-	-	-	+	-	-	-	+	+	-	-	-	-	-	-	-	-	-	-	-	-	+	+	-	+
CH40-30 (n = 9)
LSQ12	-	-	-	-	-	-	-	-	-	-	-	-	-	-	-	-	-	-	-	-	+	-	-	-	-	-	-	-	-	-	-	+	-	-	-	-	-	-	-	-	-	-	-	-	-	-	-	-	-
LSQ13	+	-	-	-	-	+	-	-	-	-	-	-	-	-	-	-	-	-	+	+	-	-	-	-	-	-	+	-	-	-	-	+	-	-	-	-	-	-	-	+	-	-	-	-	-	-	-	-	-
LSQ14	+	-	+	-	-	+	-	-	-	-	-	-	-	-	-	-	-	-	-	+	-	-	-	-	-	-	+	-	-	-	-	+	-	-	-	-	-	-	-	+	-	-	-	-	-	-	-	-	+
LSQ15	-	-	-	-	-	-	-	-	-	-	-	-	-	-	-	-	-	-	+	-	-	-	-	-	-	-	-	+	-	-	-	+	-	-	-	-	-	-	-	-	-	-	-	-	-	-	-	-	-
LSQ16	-	+	-	-	-	-	-	-	-	+	-	-	-	+	+	-	-	-	-	-	-	-	-	-	-	-	-	+	-	-	-	+	+	-	-	-	-	-	-	-	-	-	-	-	-	+	+	-	+
LSQ17	+	-	+	-	-	+	-	-	-	-	-	-	-	-	-	-	-	-	-	+	-	-	-	-	-	-	+	-	-	-	-	+	-	-	-	-	-	-	-	+	-	-	-	-	-	-	-	-	+
LSQ18	-	-	+	-	-	+	-	-	-	-	-	-	-	-	-	-	-	-	-	+	-	-	-	-	-	-	+	-	-	-	-	+	-	-	-	-	-	-	-	+	-	-	-	-	-	-	-	-	-
LSQ19	+	-	-	-	-	+	-	-	-	-	-	-	-	-	-	-	-	-	-	+	-	+	-	-	-	-	+	-	-	-	-	+	-	-	-	-	-	-	-	+	-	-	-	-	-	-	-	-	+
LSQ20	+	-	+	-	-	+	-	-	-	-	-	-	-	-	-	-	-	-	-	+	-	-	-	-	-	-	+	-	-	-	-	+	-	-	-	+	-	-	-	+	-	-	-	-	-	-	-	-	-
CH35-27 (n = 6)
LSQ21	-	-	-	-	-	-	-	-	-	-	-	-	-	-	-	-	-	-	-	-	-	-	-	-	-	-	-	+	-	-	-	+	-	-	-	-	-	-	-	-	-	-	-	-	-	-	-	-	-
LSQ22	-	-	-	-	-	-	-	-	-	-	-	-	-	+	+	-	-	-	-	-	-	-	-	-	-	-	-	+	-	-	-	+	+	-	-	-	-	-	-	-	-	-	-	-	-	-	+	-	-
LSQ23	-	+	-	-	-	-	-	-	-	+	-	-	+	+	+	-	+	-	-	-	-	-	-	-	-	-	-	+	-	-	-	+	+	-	-	-	-	-	-	-	-	-	-	-	-	+	+	-	-
LSQ24	-	-	-	-	-	-	-	-	-	-	-	-	-	-	-	-	-	-	-	-	-	-	-	-	-	-	-	+	-	-	+	+	-	-	-	-	-	-	-	-	-	-	-	-	-	-	-	-	-
LSQ25	-	-	-	-	-	-	-	-	-	-	-	-	-	+	+	-	-	-	+	-	-	-	-	-	-	-	-	+	-	-	-	+	+	-	-	-	-	-	-	-	-	-	-	-	-	-	+	-	-
LSQ26	-	+	-	-	-	-	-	-	-	+	-	-	-	+	+	-	-	-	-	+	-	-	-	-	-	-	-	+	-	-	+	+	+	-	-	-	-	-	-	-	-	-	-	-	-	+	+	-	+
CH37-27 (n = 4)
LSQ27	-	-	-	-	-	+	-	-	-	-	-	-	-	-	-	-	-	-	-	-	-	-	-	-	-	-	+	-	-	-	-	+	-	-	-	-	-	-	-	+	-	-	-	-	-	-	-	-	+
LSQ28	+	-	+	-	-	+	-	-	-	+	-	-	-	-	-	-	-	-	-	+	-	-	-	-	-	-	+	-	-	-	-	+	+	-	-	+	-	-	-	+	-	-	-	-	-	+	-	-	-
LSQ29	-	+	-	-	-	-	-	-	-	+	-	-	-	+	+	-	-	+	-	-	-	-	-	-	-	-	-	+	-	-	-	+	+	-	-	-	-	-	-	-	-	-	-	-	-	+	+	-	+
LSQ30	-	+	-	-	+	-	-	-	-	+	-	-	-	+	+	-	-	-	+	-	-	-	-	-	-	-	-	+	-	-	+	+	+	-	-	-	-	+	-	-	-	-	-	-	-	+	+	-	+
CH11-54 (n = 7)
LSQ31	-	-	-	-	-	-	-	+	+	-	-	-	-	-	-	-	-	-	-	+	-	-	-	-	-	+	-	+	-	-	-	+	+	-	-	-	-	-	+	-	-	-	-	-	-	+	-	+	+
LSQ32	+	-	+	+	+	-	-	-	-	+	-	-	-	+	+	-	-	-	+	-	-	-	-	-	-	-	-	+	-	-	-	+	+	-	-	-	-	+	-	-	-	-	-	-	-	+	+	-	+
LSQ33	-	-	-	-	-	-	-	-	-	-	-	-	-	+	-	-	-	-	-	-	-	-	-	-	-	-	-	-	-	-	-	+	-	-	-	-	-	-	-	-	-	-	-	-	-	-	+	-	-
LSQ34	-	-	-	-	+	-	-	-	-	-	-	-	-	-	-	-	-	-	+	-	-	-	-	-	-	-	-	-	-	-	+	+	+	-	-	-	-	+	-	-	-	-	-	-	-	-	-	-	+
LSQ35	-	-	-	-	-	-	-	-	-	-	+	-	+	-	-	-	-	-	-	-	-	+	-	-	-	-	-	+	+	-	-	+	+	-	-	-	-	-	+	-	+	+	-	-	+	+	+	-	+
LSQ36	-	-	-	-	-	-	-	-	-	-	+	-	+	-	-	-	-	-	-	-	-	+	-	-	-	-	-	+	-	-	-	+	+	-	-	-	-	-	+	-	+	+	-	-	+	+	+	-	+
LSQ37	-	-	-	-	-	-	-	-	-	-	-	-	-	-	-	-	-	-	-	-	-	-	-	-	-	-	-	-	-	-	-	+	-	-	-	-	-	-	-	-	-	-	-	-	-	-	-	-	-
CH40-41 (n = 4)
LSQ38	-	-	-	-	-	-	-	-	-	+	-	-	-	+	+	-	-	-	+	-	-	-	-	-	-	-	-	+	-	-	-	+	+	-	-	-	-	-	-	-	-	-	-	-	-	+	+	-	+
LSQ39	-	-	-	-	-	-	-	-	-	-	-	-	-	-	-	-	-	-	-	-	-	-	-	-	-	-	-	+	-	-	-	+	-	-	-	-	-	-	-	-	-	-	-	-	-	-	-	-	-
LSQ40	-	+	-	+	+	-	-	-	-	-	-	-	-	-	-	-	-	-	-	-	-	-	-	-	+	-	-	+	-	-	+	+	-	-	-	-	-	+	-	-	-	-	-	-	-	-	-	-	-
LSQ41	-	+	-	-	-	-	-	-	-	+	-	-	-	+	+	-	+	-	+	-	-	-	-	-	-	-	-	+	-	-	-	+	+	-	-	-	-	-	-	-	-	-	-	-	-	+	+	-	+
CH26-5 (n = 3)
LSQ42	-	-	+	-	-	-	-	+	-	-	-	-	-	-	-	-	-	-	-	+	-	-	-	-	-	-	-	+	-	-	-	+	+	-	-	-	-	-	-	-	-	-	-	-	-	+	+	-	-
LSQ43	-	+	-	-	-	-	-	-	-	+	-	-	-	+	+	-	-	-	-	-	-	-	-	-	-	-	-	+	-	-	-	+	+	-	-	-	-	-	-	-	-	-	-	-	-	+	+	-	-
LSQ44	-	+	-	-	-	-	-	-	-	+	-	-	-	+	+	-	-	-	+	-	-	-	-	-	-	-	-	+	-	-	-	+	+	-	-	-	-	-	-	-	-	-	-	-	-	+	+	-	-
CH26-65 (n = 2)
LSQ45	-	-	-	-	-	-	-	-	-	-	-	-	-	-	-	-	-	-	-	-	-	-	-	-	-	-	-	+	-	-	-	+	-	-	-	-	-	-	-	-	-	-	-	-	-	-	-	-	-
LSQ46	-	+	-	+	+	-	-	-	-	+	-	-	-	+	+	+	-	-	+	-	-	-	-	-	-	-	-	+	-	-	-	+	+	-	-	-	-	+	+	-	-	-	+	-	-	+	+	-	+
CH38-27 (n = 3)
LSQ47	-	+	-	-	-	-	-	-	-	-	-	-	-	+	+	-	-	+	-	-	-	-	-	-	-	-	-	+	-	-	-	+	+	+	-	-	-	-	+	-	-	-	-	-	-	-	+	-	+
LSQ48	-	+	-	-	-	-	-	+	-	-	-	+	-	-	-	-	-	-	-	-	-	+	-	-	-	-	-	+	-	-	-	+	+	+	+	-	-	-	-	-	-	-	-	-	-	+	-	-	+
LSQ49	-	-	-	-	-	-	-	-	-	-	-	-	-	-	-	-	-	-	-	-	-	-	-	-	-	-	-	-	-	-	-	+	-	-	-	-	-	-	-	-	-	-	-	-	-	-	-	-	+
ST648 (n = 3)
LSQ50	-	-	-	-	-	-	-	-	-	-	-	-	-	-	-	-	-	-	-	+	-	-	-	-	-	-	-	-	-	-	-	+	-	-	-	-	-	-	-	-	-	-	-	-	-	-	-	-	-
LSQ51	+	+	+	-	-	+	-	+	-	-	-	-	-	-	-	-	-	-	-	+	-	-	-	-	-	-	+	+	-	-	+	+	+	-	-	-	-	-	-	+	-	-	-	-	-	+	-	-	-
LSQ52	-	-	-	-	-	-	-	-	-	-	-	-	-	-	-	-	-	-	-	-	-	-	-	-	-	-	-	-	-	-	-	+	-	-	-	-	-	-	-	-	-	-	-	-	-	-	-	-	-
CH13-5 (n = 3)
LSQ53	-	-	-	-	-	-	-	-	-	-	-	-	-	-	-	-	-	-	+	-	-	-	-	-	-	-	-	-	-	-	-	+	-	-	-	-	-	-	-	-	-	-	-	-	-	-	-	-	-
LSQ54	-	-	-	-	-	-	-	-	-	-	-	-	-	-	-	-	-	-	+	-	-	-	-	-	-	-	-	-	-	-	-	+	-	-	-	-	-	-	-	-	-	-	-	-	-	-	-	-	-
LSQ55	-	-	-	-	-	-	-	-	-	-	-	-	-	-	-	-	-	-	+	-	-	+	-	-	-	-	-	-	-	-	-	+	-	-	-	-	-	-	-	-	-	-	-	-	-	-	-	-	-
Others (n = 19)
LSQ56	-	-	-	-	-	-	-	-	-	-	-	-	-	-	-	-	-	-	-	-	-	+	-	-	-	-	-	+	-	-	-	+	-	-	-	-	-	-	-	-	-	-	-	-	-	-	-	-	-
LSQ57	-	-	-	-	-	-	-	-	-	-	-	-	-	-	-	-	-	-	-	-	-	-	-	-	-	-	-	-	-	-	-	+	-	-	-	-	-	-	-	-	-	-	-	-	-	-	-	-	-
LSQ58	-	-	-	-	-	-	-	-	-	+	-	-	-	+	+	-	-	-	-	-	-	-	-	-	-	-	-	+	-	-	-	+	+	-	-	-	-	-	-	-	-	-	-	-	-	+	+	-	+
LSQ59	-	-	-	-	-	-	-	-	-	-	-	-	-	-	+	-	-	-	-	-	-	+	-	-	-	-	-	+	-	+	-	+	+	-	-	-	-	-	+	-	-	-	-	+	-	-	+	-	+
LSQ60	-	-	-	-	-	-	-	-	-	-	-	-	-	-	-	-	-	-	-	-	-	-	-	-	-	-	-	-	-	-	-	+	-	-	-	-	-	-	-	-	-	-	-	-	-	-	-	-	+
LSQ61	-	-	-	-	-	-	-	-	-	-	-	-	-	+	+	-	-	+	-	-	-	-	-	-	-	-	-	-	-	+	-	+	-	-	-	-	-	-	+	-	-	-	-	-	-	-	+	-	+
LSQ62	-	-	-	-	-	-	-	-	-	-	-	-	-	-	-	-	-	-	-	-	-	-	-	-	-	-	-	-	-	-	-	+	-	-	-	-	-	-	-	-	-	-	-	-	-	-	-	-	-
LSQ63	-	+	-	-	-	-	-	+	-	-	-	-	-	-	-	-	-	-	+	-	-	-	-	-	-	-	-	+	-	-	-	+	+	+	-	-	-	-	-	-	-	-	-	-	-	+	+	-	-
LSQ64	-	-	-	-	-	+	-	-	-	-	-	-	+	+	+	-	-	-	-	-	-	+	-	+	-	-	+	+	-	+	-	+	-	-	+	+	-	-	-	+	+	+	-	-	+	+	+	-	+
LSQ65	+	-	+	-	-	-	-	-	-	+	-	-	-	+	+	-	-	-	-	-	-	-	+	-	-	-	-	+	-	-	+	+	+	-	-	-	-	-	-	-	-	-	-	-	-	+	+	-	-
LSQ66	-	-	-	-	-	-	+	+	-	-	-	+	-	+	+	-	-	-	-	-	-	-	-	-	-	-	-	-	-	-	-	+	-	-	-	-	-	+	+	-	-	-	-	-	-	-	-	+	+
LSQ67	-	+	-	+	+	+	-	-	-	+	-	-	-	+	+	-	-	-	+	-	-	-	-	-	-	-	-	+	-	-	+	+	+	-	-	-	+	+	+	+	-	-	-	-	-	+	+	-	+
LSQ68	+	-	+	-	+	+	-	-	-	-	-	-	-	-	-	-	-	-	+	+	-	-	-	-	-	-	+	-	-	-	+	+	+	-	-	-	-	+	-	+	-	-	-	-	-	-	-	-	+
LSQ69	-	-	-	-	-	-	-	-	-	-	-	-	-	-	-	-	-	-	-	-	-	-	-	-	-	-	-	-	-	-	-	+	-	-	-	-	-	-	-	-	-	-	-	-	-	-	-	-	+
LSQ70	-	-	-	-	-	-	-	-	-	-	-	-	-	-	-	-	-	-	-	-	-	-	-	-	-	-	-	-	-	-	-	+	-	-	-	-	-	-	-	-	-	-	-	-	-	-	-	-	-
LSQ71	-	-	-	-	-	-	-	-	-	+	-	-	-	-	-	-	-	-	-	-	-	-	-	-	-	-	-	-	-	-	-	+	+	+	-	-	-	-	-	-	-	-	-	-	-	+	-	-	-
LSQ72	-	-	+	-	-	+	-	-	-	+	-	-	-	-	-	-	-	-	-	+	-	-	-	-	-	-	+	-	-	-	-	+	-	-	-	-	-	-	-	+	-	-	-	-	-	+	-	-	-
LSQ73	-	-	-	-	-	-	-	-	-	+	-	-	-	-	-	-	+	-	-	-	-	-	-	+	-	-	-	+	-	-	-	+	+	-	-	-	-	-	-	-	-	-	-	-	-	+	-	-	-
LSQ74	-	+	-	-	-	-	-	-	-	-	-	-	-	-	-	-	-	-	-	-	-	-	-	+	-	-	-	+	-	-	-	+	-	-	-	-	-	-	-	-	-	-	-	-	-	-	-	-	-
aThe ‘+’ indicates the presence of that particular gene in the strain while ‘-’ indicates its absence.
[truncated: 6 more columns]

## Sheet: Table S3
TABLE S3 Virulence factors (VF) in the 74 strains.
Strain	Adherence
	AAFs			Afa/Dr family	Afimbrial adhesin AFA-I				Dispersin	Dr adhesins					ECP (E. coli common pilus)						F1845 fimbrial adhesin		F1C fimbriae					FdeC	P fimbriae												S fimbriae
	aggB	aggC	aggD	draE2	afaA	afaB-I	afaC-I	afaD	aap/aspU	draA	draB	draC	draD	draP	yagZ/ecpA	yagY/ecpB	yagX/ecpC	yagW/ecpD	yagV/ecpE	ykgK/ecpR	daaC	daaF	focC	focD	focF	focG	focH	fdeC	papA	papB	papC	papD	papE	papF	papG	papH	papI	papJ	papK	papX	sfaB	sfaC	sfaD	sfaE	sfaF	sfaG	sfaH	sfaS	sfaX
CH14-64 (11)
LSQ01	-a	-	-	-	-	-	-	-	-	-	-	-	-	-	+a	+	+	+	+	+	-	-	-	-	-	-	-	+	-	+	-	-	-	-	-	-	+	-	-	+	-	-	-	-	-	-	-	-	-
LSQ02	-	-	-	-	-	-	-	-	-	-	-	-	-	-	+	+	+	+	+	+	-	-	-	-	-	-	-	+	-	+	-	-	-	-	-	-	+	-	-	+	-	-	-	-	-	-	-	-	-
LSQ03	-	-	-	-	-	-	-	-	-	-	-	-	-	-	+	+	+	+	+	+	-	-	-	-	-	-	-	+	-	+	-	-	-	-	-	-	+	-	-	+	-	-	-	-	-	-	-	-	+
LSQ04	-	-	-	-	-	-	-	-	-	-	-	-	-	-	-	-	-	-	-	-	-	-	-	-	-	-	-	+	-	+	-	-	-	-	-	-	+	-	-	+	-	-	-	-	-	-	-	-	-
LSQ05	-	-	-	-	-	-	-	-	-	-	-	-	-	-	+	+	+	+	+	+	-	-	-	-	-	-	-	+	-	+	-	-	-	-	-	-	+	-	-	+	-	-	-	-	-	-	-	-	-
LSQ06	-	-	-	-	-	-	-	-	-	-	-	-	-	-	+	+	+	+	+	+	-	-	-	-	-	-	-	+	-	+	+	+	-	+	-	+	+	+	+	+	-	-	-	-	-	-	-	-	-
LSQ07	-	-	-	-	-	-	-	-	-	-	-	-	-	-	+	+	+	+	+	+	-	-	-	-	-	-	-	+	-	+	-	-	-	-	-	-	+	-	-	+	-	-	-	-	-	-	-	-	-
LSQ08	-	-	-	-	-	-	-	-	-	-	-	-	-	-	+	+	+	+	+	+	-	-	-	-	-	-	-	+	-	+	-	-	-	-	-	-	+	-	-	+	-	-	-	-	-	-	-	-	+
LSQ09	-	-	-	-	-	-	-	-	-	-	-	-	-	-	+	+	+	+	+	+	-	-	-	-	-	-	-	+	-	+	-	-	-	-	-	-	+	-	-	+	-	-	-	-	-	-	-	-	+
LSQ10	-	-	-	-	-	-	-	-	-	-	-	-	-	-	+	+	+	+	+	+	-	-	-	-	-	-	-	+	-	+	-	-	-	-	-	-	+	-	-	+	-	-	-	-	-	-	-	-	-
LSQ11	-	-	-	-	-	-	-	-	-	-	-	-	-	-	+	+	+	+	+	+	-	-	-	-	-	-	-	+	-	+	-	-	-	-	-	-	+	-	-	+	-	-	-	-	-	-	-	-	+
CH40-30 (9)
LSQ12	-	-	-	-	-	-	-	-	-	-	-	-	-	-	+	+	+	+	+	+	-	-	-	-	-	-	-	+	-	+	+	+	+	+	+	+	+	+	+	+	-	-	-	-	-	-	-	-	-
LSQ13	-	-	-	-	-	-	-	-	-	-	-	-	-	-	+	+	+	+	+	+	-	-	-	-	-	-	-	+	-	+	+	+	-	+	+	+	+	+	+	+	-	-	-	-	-	-	-	-	-
LSQ14	-	-	-	-	-	-	-	-	-	-	-	-	-	-	+	+	+	+	+	+	-	-	-	-	-	-	-	+	-	+	+	+	-	+	+	+	+	+	+	+	-	-	-	-	-	-	-	-	+
LSQ15	-	-	-	-	-	-	-	-	-	-	-	-	-	-	+	+	+	+	+	+	-	-	-	-	-	-	-	+	-	+	-	-	-	-	-	-	+	-	-	+	-	-	-	-	-	-	-	-	+
LSQ16	-	-	-	-	-	-	-	-	-	-	-	-	-	-	+	+	+	+	+	+	-	-	-	-	-	-	-	+	-	+	-	-	-	-	-	-	+	-	-	+	-	-	-	-	-	-	-	-	+
LSQ17	-	-	-	-	-	-	-	-	-	-	-	-	-	-	+	+	+	+	+	+	-	-	-	-	-	-	-	+	-	+	+	+	-	+	+	+	+	+	+	+	-	-	-	-	-	-	-	-	-
LSQ18	-	-	-	-	-	-	-	-	-	-	-	-	-	-	+	+	+	+	+	+	-	-	-	-	-	-	-	+	-	+	+	+	-	+	+	+	+	+	+	+	-	-	-	-	-	-	-	-	-
LSQ19	-	-	-	-	-	-	-	-	-	-	-	-	-	-	+	+	+	+	+	+	-	-	-	-	-	-	-	+	-	+	+	+	-	+	+	+	+	+	+	+	-	-	-	-	-	-	-	-	-
LSQ20	-	-	-	-	-	-	-	-	-	-	-	-	-	-	+	+	+	+	+	+	-	-	-	-	-	-	-	+	-	+	+	+	-	+	+	+	+	+	+	+	-	-	-	-	-	-	-	-	+
CH35-27 (6)
LSQ21	-	-	-	-	-	-	-	-	-	-	-	-	-	-	+	+	+	+	+	+	-	-	-	-	-	-	-	+	-	+	+	+	+	+	-	+	+	+	+	+	-	-	-	-	-	-	-	-	-
LSQ22	-	-	-	-	-	-	-	-	-	-	-	-	-	-	+	+	+	+	+	+	-	-	-	-	-	-	-	+	-	+	+	+	-	+	+	+	+	+	+	+	-	-	-	-	-	-	-	-	-
LSQ23	-	-	-	-	-	-	-	-	-	-	-	-	-	-	+	+	+	+	+	+	-	-	-	-	-	-	-	+	-	+	+	+	-	+	+	+	+	+	+	+	-	-	-	-	-	-	-	-	-
LSQ24	-	-	-	-	-	-	-	-	-	-	-	-	-	-	+	+	+	+	+	+	-	-	-	-	-	-	-	+	-	-	-	-	-	-	-	-	-	-	-	-	-	-	-	-	-	-	-	-	-
LSQ25	-	-	-	-	-	-	-	-	-	-	-	-	-	-	+	+	+	+	+	+	-	-	-	-	-	-	-	+	-	-	-	-	-	-	-	-	-	-	-	-	-	-	-	-	-	-	-	-	-
LSQ26	-	-	-	-	-	-	-	-	-	-	-	-	-	-	+	+	+	+	+	+	-	-	-	-	-	-	-	+	-	+	+	+	-	+	+	+	+	+	+	+	-	-	-	-	-	-	-	-	-
CH37-27 (4)
LSQ27	-	-	-	-	-	-	-	-	-	-	-	-	-	-	+	+	+	+	+	+	-	-	-	-	-	-	-	+	-	-	-	-	-	-	-	-	-	-	-	+	-	-	-	-	-	-	-	-	+
LSQ28	-	-	-	-	-	-	-	-	-	-	-	-	-	-	+	+	+	+	+	+	-	-	-	-	-	-	-	+	-	-	-	-	-	-	-	-	-	-	-	+	-	-	-	-	-	-	-	-	+
LSQ29	-	-	-	-	-	-	-	-	-	-	-	-	-	-	+	+	+	+	+	+	-	-	-	-	-	-	-	+	-	+	-	-	-	-	-	-	+	-	-	+	-	-	-	-	-	-	-	-	-
LSQ30	-	-	-	-	-	-	-	-	-	-	-	-	-	-	+	+	+	+	+	+	-	-	-	-	-	-	-	+	+	+	+	+	-	+	+	+	+	+	+	+	-	-	-	-	-	-	-	-	-
CH11-54 (7)
LSQ31	-	-	-	-	-	-	-	-	-	-	-	-	-	-	-	-	-	-	-	-	-	-	-	-	-	-	-	+	-	-	-	-	-	-	-	-	-	-	-	-	-	-	-	-	-	-	-	-	-
LSQ32	-	-	-	-	-	-	-	-	-	-	-	-	-	-	+	+	+	+	+	+	-	-	-	-	-	-	-	+	-	-	-	-	-	-	-	-	-	-	-	-	-	-	-	-	-	-	-	-	-
LSQ33	-	-	-	-	-	-	-	-	-	-	-	-	-	-	+	+	+	+	+	+	-	-	-	-	-	-	-	+	-	-	-	-	-	-	-	-	-	-	-	-	-	-	-	-	-	-	-	-	-
LSQ34	+	+	+	-	-	-	-	-	+	-	-	-	-	-	+	+	+	+	+	+	-	-	-	-	-	-	-	-	-	+	+	+	-	+	+	+	+	+	+	+	-	-	-	-	-	-	-	-	-
LSQ35	-	-	-	-	-	-	-	-	-	-	-	-	-	-	+	+	+	+	+	+	-	-	-	-	-	-	-	+	-	-	-	-	-	-	-	-	-	-	-	-	-	-	-	-	-	-	-	-	-
LSQ36	-	-	-	-	-	-	-	-	-	-	-	-	-	-	+	+	+	+	+	+	-	-	-	-	-	-	-	+	-	-	-	-	-	-	-	-	-	-	-	-	-	-	-	-	-	-	-	-	-
LSQ37	-	-	-	-	-	-	-	-	-	-	-	-	-	-	+	+	+	+	+	+	-	-	-	-	-	-	-	+	-	-	-	-	-	-	-	-	-	-	-	-	-	-	-	-	-	-	-	-	-
CH40-41 (4)
LSQ38	-	-	-	-	-	-	-	-	+	-	-	-	-	-	+	+	+	+	+	+	-	-	-	-	-	-	-	-	-	+	-	-	-	-	-	-	+	-	-	+	-	-	-	-	-	-	-	-	-
LSQ39	-	-	-	-	-	-	-	-	-	-	-	-	-	-	+	+	+	+	+	+	-	-	-	-	-	-	-	+	-	+	-	-	-	-	-	-	+	-	-	+	-	-	-	-	-	-	-	-	+
LSQ40	-	-	-	-	-	-	-	-	-	-	-	-	-	-	+	+	+	+	+	+	-	-	-	-	-	-	-	+	-	+	-	-	-	-	-	-	+	-	-	+	-	-	-	-	-	-	-	-	+
LSQ41	-	-	-	-	-	-	-	-	-	-	-	-	-	-	+	+	+	+	+	+	-	-	-	-	-	-	-	+	-	+	-	-	-	-	-	-	+	-	-	+	-	-	-	-	-	-	-	-	+
CH26-5 (3)
LSQ42	-	-	-	-	+	+	+	+	-	-	-	+	-	+	+	+	+	+	+	+	-	+	-	-	-	-	-	+	-	-	-	-	-	-	-	-	-	-	-	+	-	-	-	-	-	-	-	-	+
LSQ43	-	-	-	-	-	-	-	-	-	-	-	-	-	-	+	+	+	+	+	+	-	-	-	-	-	-	-	+	-	-	-	-	-	-	-	-	-	-	-	+	-	-	-	-	-	-	-	-	+
LSQ44	-	-	-	-	-	-	-	-	-	-	-	-	-	-	+	+	+	+	+	+	-	-	-	-	-	-	-	+	-	+	-	-	-	-	-	-	-	-	-	+	-	-	-	-	-	-	-	-	+
CH26-65 (2)
LSQ45	-	-	-	+	-	+	+	-	-	+	+	+	+	+	+	+	+	+	+	+	-	+	-	-	-	-	-	+	-	+	-	-	-	-	-	-	+	-	-	+	-	-	-	-	-	-	-	-	-
LSQ46	-	-	-	-	-	-	-	-	-	-	-	-	-	-	+	+	+	+	+	+	-	-	-	-	-	-	-	+	-	+	-	-	+	+	-	-	+	-	-	+	-	-	-	-	-	-	-	-	+
CH38-27 (3)
LSQ47	-	-	-	-	-	-	-	-	-	-	-	-	-	-	+	+	+	+	+	+	-	-	-	-	-	-	-	+	-	+	+	+	+	+	+	+	+	+	+	+	-	-	-	-	-	-	-	-	+
LSQ48	-	-	-	-	-	-	-	-	-	-	-	-	-	-	+	+	+	+	+	+	-	-	-	-	-	-	-	+	-	+	+	+	+	+	+	+	+	+	+	+	-	-	-	-	-	-	-	-	-
LSQ49	-	-	-	-	-	-	-	-	-	-	-	-	-	-	+	+	+	+	+	+	-	-	-	-	-	-	-	+	-	+	+	+	+	+	+	+	+	+	+	+	-	-	-	-	-	-	-	-	+
ST648 (3)
LSQ50	-	-	-	-	-	-	-	-	-	-	-	-	-	-	+	+	+	+	+	+	-	-	-	-	-	-	-	+	-	-	-	-	-	-	-	-	-	-	-	+	-	-	-	-	-	-	-	-	+
LSQ51	-	-	-	-	-	-	-	-	-	-	-	-	-	-	+	+	+	+	+	+	-	-	-	-	-	-	-	+	-	-	-	-	-	-	-	-	-	-	-	-	-	-	-	-	-	-	-	-	-
LSQ52	-	-	-	-	-	-	-	-	-	-	-	-	-	-	+	+	+	+	+	+	-	-	-	-	-	-	-	+	-	-	-	-	-	-	-	-	-	-	-	+	-	-	-	-	-	-	-	-	+
CH13-5 (3)
LSQ53	-	-	-	-	-	-	-	-	-	-	-	-	-	-	+	+	+	+	+	+	-	-	-	-	-	-	+	+	-	+	+	+	-	+	+	+	+	+	+	+	+	+	+	+	+	+	-	-	+
LSQ54	-	-	-	-	-	-	-	-	-	-	-	-	-	-	+	+	+	+	+	+	-	-	+	+	+	-	+	+	-	+	+	+	-	+	+	+	+	+	+	+	+	+	+	+	+	+	-	-	+
LSQ55	-	-	-	-	-	-	-	-	-	-	-	-	-	-	+	+	+	+	+	+	-	-	-	+	+	-	+	+	-	+	+	+	-	+	+	+	+	+	+	+	+	+	+	+	+	+	-	-	+
Others (19)
LSQ56	-	-	-	-	-	-	-	-	-	-	-	-	-	-	+	+	+	+	+	+	-	-	+	+	-	-	-	+	-	+	+	+	+	+	-	+	+	+	+	+	+	+	+	+	+	+	+	+	+
LSQ57	-	-	-	-	-	-	-	-	-	-	-	-	-	-	+	+	+	+	+	+	-	-	+	+	+	+	+	+	-	+	+	+	-	+	+	+	+	+	+	+	+	+	+	-	+	+	+	-	+
LSQ58	-	-	-	-	-	-	-	-	-	-	-	-	-	-	-	-	-	+	+	-	-	-	-	-	-	-	-	+	-	+	-	-	-	+	-	-	+	-	-	+	-	-	-	-	-	-	-	-	+
LSQ59	-	-	-	-	-	-	-	-	-	-	-	-	-	-	+	+	+	+	+	+	-	-	-	-	-	-	-	-	-	-	-	-	-	-	-	-	-	-	-	-	-	-	-	-	-	-	-	-	-
LSQ60	-	-	-	-	-	-	-	-	-	-	-	-	-	-	+	+	+	+	+	+	-	-	-	-	-	-	-	+	-	-	-	-	-	-	-	-	-	-	-	-	-	-	-	-	-	-	-	-	-
LSQ61	-	-	-	-	-	-	-	-	-	-	-	-	-	-	+	+	+	+	+	+	-	-	-	-	-	-	-	+	-	+	-	-	-	-	-	-	+	-	-	+	-	-	-	-	-	-	-	-	+
LSQ62	-	-	-	-	-	-	-	-	-	-	-	-	-	-	+	+	+	+	+	+	-	-	-	-	-	-	-	+	-	-	-	-	-	-	-	-	-	-	-	+	-	-	-	-	-	-	-	-	+
LSQ63	-	-	-	-	-	-	-	-	-	-	-	-	-	-	+	+	+	+	+	+	-	-	-	-	-	-	-	-	-	-	-	-	-	-	-	-	-	-	-	-	-	-	-	-	-	-	-	-	-
LSQ64	-	-	-	-	-	-	-	-	-	-	-	-	-	-	+	+	+	+	+	+	-	-	-	-	-	-	-	-	-	-	-	-	-	-	-	-	-	-	-	-	-	-	-	-	-	-	-	-	-
LSQ65	-	-	-	-	-	-	-	-	-	-	-	-	-	-	+	+	+	+	+	+	-	-	-	-	-	-	-	+	-	+	+	+	-	+	+	+	+	+	+	+	-	-	-	-	-	-	-	-	-
LSQ66	-	-	-	-	-	-	-	-	-	-	-	-	-	-	+	+	+	+	+	+	-	-	-	-	-	-	-	+	-	-	-	-	-	-	-	-	-	-	-	-	-	-	-	-	-	-	-	-	-
LSQ67	-	-	-	-	-	-	-	-	-	-	-	-	-	-	+	+	+	+	+	+	-	-	-	-	-	-	-	+	-	+	-	-	-	-	-	-	+	-	-	-	-	-	-	-	-	-	-	-	-
LSQ68	-	-	-	-	-	-	-	-	-	-	-	-	-	-	+	+	+	+	+	+	-	-	-	-	-	-	-	+	-	-	-	-	-	-	-	-	-	-	-	-	-	-	-	-	-	-	-	-	-
LSQ69	-	-	-	-	-	-	-	-	-	-	-	-	-	-	+	+	+	+	+	+	-	-	-	-	-	-	-	-	-	+	+	+	+	+	+	+	+	+	+	+	-	-	-	-	-	-	-	-	+
LSQ70	-	-	-	-	-	-	-	-	-	-	-	-	-	-	+	+	+	+	+	+	-	-	-	-	-	-	-	+	-	-	-	-	-	-	-	-	-	-	-	-	-	-	-	-	-	-	-	-	-
LSQ71	-	-	-	-	+	+	+	-	-	-	-	-	+	+	+	+	+	+	+	+	+	+	-	-	-	-	-	+	-	-	-	-	-	-	-	-	-	-	-	+	-	-	-	-	-	-	-	-	+
LSQ72	-	-	-	-	-	-	-	-	-	-	-	-	-	-	+	+	+	+	+	+	-	-	-	-	-	-	-	+	-	+	+	+	-	+	+	+	-	+	+	+	-	-	-	-	-	-	-	-	-
LSQ73	-	-	-	-	-	-	-	-	-	-	-	-	-	-	+	+	+	+	+	+	-	-	-	-	-	-	-	-	-	-	-	-	-	-	-	-	-	-	-	-	-	-	-	-	-	-	-	-	-
LSQ74	-	-	-	-	-	-	-	-	-	-	-	-	-	-	+	+	+	+	+	+	-	-	-	-	-	-	-	+	-	-	-	-	-	-	-	-	-	-	-	-	-	-	-	-	-	-	-	-	-
aThe ‘+’ indicates the presence of that particular gene in the strain while ‘-’ indicates its absence.
[truncated: 126 more columns]

## Sheet: Table S4
Table S4 Differential ARGs and VFs according to CH or ST types among the 74 ExPEC isolates.
Characteristic			No. (%) of isolates													P
			All (n = 74)	CH14-64 (n = 11)	CH40-30 (n = 9)	CH35-27 (n = 6)	CH37-27 (n = 4)	CH11-54 (n = 7)	CH40-41 (n = 4)	CH26-5 (n = 3)	CH26-65 (n = 2)	CH38-27 (n = 3)	ST648a (n = 3)	CH13-5 (n = 3)	Othersb (n = 19)
ARGs
Aminoglycoside	rmtB		1 (1.4)	0	0	0	0	0	0	0	1c (50)	0	0	0	0	0.027
Beta-lactam	blaCTX-M-15		14 (18.9)	0	6c (66.7)	1 (16.7)	1 (25)	1 (14.3)	0	1 (33.3)	0	0	2 (66.7)	0	2 (10.5)	0.011
	blaOXA-1		12 (16.2)	0	6c (66.7)	0	2 (50)	0	0	0	0	0	1 (33.3)	0	3 (15.8)	0.006
	blaTEM-1B		40 (54.1)	5 (45.5)	2 (22.2)	6 (100)	2 (50)	4 (57.1)	4 (100)	3 (100)	2 (100)	2 (66.7)	1 (33.3)	0	9 (47.4)	0.017
DDR (double drug resistance)	aac(6')-Ib-cr		13 (17.6)	0	6c (66.7)	0	2 (50)	0	0	0	0	0	1 (33.3)	0	4 (21.1)	0.008
Quinolone	qepA1		1 (1.4)	0	0	0	0	0	0	0	1c (50)	0	0	0	0	0.027
Tetracycline	tetB		17 (23)	2 (18.2)	0	4c (66.7)	2 (50)	1 (14.3)	0	0	0	0	0	3c (100)	5 (26.3)	0.011
ARG score, median (IQR)d			7.5 (3-11.3)	4 (1-10)	7 (4-7)	8.5 (3-13)	12 (6.8-14.3)	13 (3-15)	9.5 (3.5-12.5)	10 (9-11)e	(2-18)f	11 (2-12)e	2 (1-13)e	3 (3-4)e	8 (2-11)	0.433
VFs
Adherence	Afa/Dr family	draE2	1 (1.4)	0	0	0	0	0	0	0	1c (50)	0	0	0	0	0.027
	Dr adhesins	draA	1 (1.4)	0	0	0	0	0	0	0	1c (50)	0	0	0	0	0.027
		draB	1 (1.4)	0	0	0	0	0	0	0	1c (50)	0	0	0	0	0.027
		draC	2 (2.7)	0	0	0	0	0	0	1 (33.3)	1 (50)	0	0	0	0	0.018
	F1C fimbriae	focH	4 (5.4)	0	0	0	0	0	0	0	0	0	0	3c (100)	1 (5.3)	0.001
	P fimbriae	papB	48 (64.9)	11c (100)	9c (100)	4 (66.7)	2 (50)	1c (14.3)	4 (100)	1 (33.3)	2 (100)	3 (100)	0	3 (100)	8c (42.1)	< 0.001
		papC	25 (33.8)	1 (9.1)	7c (77.8)	4 (66.7)	1 (25)	1 (14.3)	0	0	0	3 (100)	0	3 (100)	5 (26.3)	< 0.001
		papD	25 (33.8)	1 (9.1)	7c (77.8)	4 (66.7)	1 (25)	1 (14.3)	0	0	0	3 (100)	0	3 (100)	5 (26.3)	< 0.001
		papE	8 (10.8)	0	1 (11.1)	1 (16.7)	0	0	0	0	1 (50)	3c (100)	0	0	2 (10.5)	0.01
		papF	27 (36.5)	1 (9.1)	7c (77.8)	4 (66.7)	1 (25)	1 (14.3)	0	0	1 (50)	3 (100)	0	3 (100)	6 (31.6)	< 0.001
		papG	22 (29.7)	0c	7c (77.8)	3 (50)	1 (25)	1 (14.3)	0	0	0	3c (100)	0	3c (100)	4 (21.1)	< 0.001
		papH	25 (33.8)	1 (9.1)	7c (77.8)	4 (66.7)	1 (25)	1 (14.3)	0	0	0	3 (100)	0	3 (100)	5 (26.3)	< 0.001
		papI	46 (62.2)	11c (100)	9c (100)	4 (66.7)	2 (50)	1c (14.3)	4 (100)	0	2 (100)	3 (100)	0	3 (100)	7c (36.8)	< 0.001
		papJ	25 (33.8)	1 (9.1)	7c (77.8)	4 (66.7)	1 (25)	1 (14.3)	0	0	0	3 (100)	0	3 (100)	5 (26.3)	< 0.001
		papK	25 (33.8)	1 (9.1)	7c (77.8)	4 (66.7)	1 (25)	1 (14.3)	0	0	0	3 (100)	0	3 (100)	5 (26.3)	< 0.001
		papX	55 (74.3)	11 (100)	9 (100)	4 (66.7)	4 (100)	1c (14.3)	4 (100)	3 (100)	2 (100)	3 (100)	2 (66.7)	3 (100)	9c (47.4)	< 0.001
	S fimbriae	sfaB	5 (6.8)	0	0	0	0	0	0	0	0	0	0	3c (100)	2 (10.5)	0.004
		sfaC	5 (6.8)	0	0	0	0	0	0	0	0	0	0	3c (100)	2 (10.5)	0.004
		sfaD	5 (6.8)	0	0	0	0	0	0	0	0	0	0	3c (100)	2 (10.5)	0.004
		sfaE	4 (5.4)	0	0	0	0	0	0	0	0	0	0	3c (100)	1 (5.3)	0.001
		sfaF	5 (6.8)	0	0	0	0	0	0	0	0	0	0	3c (100)	2 (10.5)	0.004
		sfaG	5 (6.8)	0	0	0	0	0	0	0	0	0	0	3c (100)	2 (10.5)	0.004
		sfaX	31 (41.9)	4 (36.4)	4 (44.4)	0	2 (50)	0	3 (75)	3 (100)	1 (50)	2 (66.7)	2 (66.7)	3 (100)	7 (36.8)	0.01
		sfaY	5 (6.8)	0	0	0	0	0	0	0	0	0	0	3c (100)	2 (10.5)	0.004
	Type 1 fimbriae	fimA	52 (70.3)	11c (100)	9 (100)	6 (100)	4 (100)	0c	4 (100)	1 (33.3)	2 (100)	1 (33.3)	0c	1 (33.3)	13 (68.4)	< 0.001
		fimB	70 (94.6)	11 (100)	9 (100)	6 (100)	4 (100)	7 (100)	4 (100)	3 (100)	2 (100)	3 (100)	0c	3 (100)	18 (94.7)	0.001
		fimC	70 (94.6)	11 (100)	9 (100)	6 (100)	4 (100)	7 (100)	4 (100)	3 (100)	2 (100)	3 (100)	0c	3 (100)	18 (94.7)	0.001
		fimD	70 (94.6)	11 (100)	9 (100)	6 (100)	4 (100)	7 (100)	4 (100)	3 (100)	2 (100)	3 (100)	0c	3 (100)	18 (94.7)	0.001
		fimE	70 (94.6)	11 (100)	9 (100)	6 (100)	4 (100)	7 (100)	4 (100)	3 (100)	2 (100)	3 (100)	0c	3 (100)	18 (94.7)	0.001
		fimF	70 (94.6)	11 (100)	9 (100)	6 (100)	4 (100)	7 (100)	4 (100)	3 (100)	2 (100)	3 (100)	0c	3 (100)	18 (94.7)	0.001
		fimG	70 (94.6)	11 (100)	9 (100)	6 (100)	4 (100)	7 (100)	4 (100)	3 (100)	2 (100)	3 (100)	0c	3 (100)	18 (94.7)	0.001
		fimH	70 (94.6)	11 (100)	9 (100)	6 (100)	4 (100)	7 (100)	4 (100)	3 (100)	2 (100)	3 (100)	0c	3 (100)	18 (94.7)	0.001
		fimI	70 (94.6)	11 (100)	9 (100)	6 (100)	4 (100)	7 (100)	4 (100)	3 (100)	2 (100)	3 (100)	0c	3 (100)	18 (94.7)	0.001
Autotransporter	Sat	sat	34 (45.9)	11c (100)	8c (88.9)	2 (33.3)	2 (50)	1 (14.3)	3 (75)	0	2 (100)	0	0	0	5c (26.3)	< 0.001
	Tsh	vat	18 (24.3)	10c (90.9)	0	0	0	0	0	0	0	3c (100)	0	3c (100)	2 (10.5)	< 0.001
Immune evasion	TcpC	tcpC	5 (6.8)	0	0	0	0	0	0	0	0	0	0	3c (100)	2 (10.5)	0.004
Invasion	K1 capsule	kpsD	51 (68.9)	11c (100)	8 (88.9)	4 (66.7)	3 (75)	1c (14.3)	3 (75)	3 (100)	2 (100)	3 (100)	2 (66.7)	3 (100)	8c (42.1)	0.001
		kpsM	46 (62.2)	11c (100)	7 (77.8)	2 (33.3)	4 (100)	1c (14.3)	2 (50)	3 (100)	2 (100)	3 (100)	1 (33.3)	3 (100)	7c (36.8)	< 0.001
		kpsT	14 (18.9)	9c (81.8)	0	0	0	0	0	0	0	3c (100)	0	0	2 (10.5)	< 0.001
Iron uptake	Aerobactin	iucA	48 (64.9)	11c (100)	9c (100)	2 (33.3)	2 (50)	2 (28.6)	3 (75)	0	2 (100)	3 (100)	0	3 (100)	11 (57.9)	< 0.001
		iucB	48 (64.9)	11c (100)	9c (100)	2 (33.3)	2 (50)	2 (28.6)	3 (75)	0	2 (100)	3 (100)	0	3 (100)	11 (57.9)	< 0.001
		iucC	48 (64.9)	11c (100)	9c (100)	2 (33.3)	2 (50)	2 (28.6)	3 (75)	0	2 (100)	3 (100)	0	3 (100)	11 (57.9)	< 0.001
		iutA	50 (67.6)	11c (100)	9 (100)	4 (66.7)	2 (50)	2 (28.6)	3 (75)	0c	2 (100)	3 (100)	0c	3 (100)	11 (57.9)	< 0.001
	Chu	chuA	50 (67.6)	11c (100)	9 (100)	6 (100)	1 (25)	0c	4 (100)	2 (66.7)	2 (100)	3 (100)	3 (100)	3 (100)	6c (31.6)	< 0.001
		chuS	55 (74.3)	11 (100)	9 (100)	5 (83.3)	4 (100)	0c	4 (100)	3 (100)	2 (100)	3 (100)	3 (100)	3 (100)	8c (42.1)	< 0.001
		chuT	44 (59.5)	11c (100)	9c (100)	1 (16.7)	1 (25)	0c	4 (100)	3 (100)	0	3 (100)	3 (100)	3 (100)	6c (31.6)	< 0.001
		chuU	56 (75.7)	11 (100)	9 (100)	6 (100)	4 (100)	0c	4 (100)	3 (100)	2 (100)	3 (100)	2 (66.7)	3 (100)	9c (47.4)	< 0.001
		chuV	57 (77)	11 (100)	9 (100)	6 (100)	4 (100)	0c	4 (100)	3 (100)	2 (100)	3 (100)	3 (100)	3 (100)	9c (47.4)	< 0.001
		chuW	57 (77)	11 (100)	9 (100)	6 (100)	4 (100)	0c	4 (100)	3 (100)	2 (100)	3 (100)	3 (100)	3 (100)	9c (47.4)	< 0.001
		chuX	45 (60.8)	11c (100)	9c (100)	0c	2 (50)	0c	4 (100)	3 (100)	1 (50)	3 (100)	3 (100)	3 (100)	6c (31.6)	< 0.001
		chuY	56 (75.7)	11 (100)	9 (100)	6 (100)	4 (100)	0c	4 (100)	3 (100)	2 (100)	3 (100)	3 (100)	3 (100)	8c (42.1)	< 0.001
	Shu	shuA	25 (33.8)	1 (9.1)	9 (100)	6c (100)	4c (100)	0	0	3 (100)	2 (100)	0	2 (66.7)	1 (33.3)	6 (31.6)	< 0.001
		shuS	29 (39.2)	1 (9.1)	2 (22.2)	6c (100)	2 (50)	0	3 (75)	3 (100)	2 (100)	0	2 (66.7)	1 (33.3)	7 (36.8)	< 0.001
		shuT	20 (27)	0	0	6c (100)	4c (100)	0	2 (50)	3c (100)	2 (100)	0	0	0	5 (26.3)	< 0.001
		shuU	37 (50)	5 (45.5)	8c (88.9)	5 (83.3)	4 (100)	0c	2 (50)	2 (66.7)	1 (50)	1 (33.3)	3 (100)	1 (33.3)	5c (26.3)	< 0.001
		shuV	25 (33.8)	0c	1 (11.1)	6c (100)	2 (50)	0	3 (75)	2 (66.7)	2 (100)	0	3 (100)	0	6 (31.6)	< 0.001
		shuX	22 (29.7)	0c	0	6c (100)	2 (50)	0	0	3c (100)	2 (100)	0	3c (100)	0	6 (31.6)	< 0.001
	Enterobactin	entD	49 (66.2)	0c	0c	6 (100)	4 (100)	7 (100)	0c	3 (100)	2 (100)	3 (100)	3 (100)	3 (100)	18c (94.7)	< 0.001
	Salmochelin	iroB	9 (12.2)	0	0	0	0	0	0	0	0	3c (100)	0	3c (100)	3 (15.8)	< 0.001
		iroC	9 (12.2)	0	0	0	0	0	0	0	0	3c (100)	0	3c (100)	3 (15.8)	< 0.001
		iroD	11 (14.9)	0	0	0	0	1 (14.3)	0	0	0	3c (100)	0	3c (100)	4 (21.1)	< 0.001
		iroE	11 (14.9)	0	0	0	0	1 (14.3)	0	0	0	3c (100)	0	3c (100)	4 (21.1)	< 0.001
		iroN	9 (12.2)	0	0	0	0	0	0	0	0	3c (100)	0	3c (100)	3 (15.8)	< 0.001
	Yersiniabactin	fyuA	59 (79.7)	11 (100)	9 (100)	5 (83.3)	4 (100)	2c (28.6)	4 (100)	3 (100)	2 (100)	3 (100)	3 (100)	3 (100)	10c (52.6)	0.002
		irp1	59 (79.7)	11 (100)	9 (100)	5 (83.3)	4 (100)	2c (28.6)	4 (100)	3 (100)	2 (100)	3 (100)	3 (100)	3 (100)	10c (52.6)	0.002
		irp2	58 (78.4)	11 (100)	9 (100)	5 (83.3)	4 (100)	2c (28.6)	4 (100)	3 (100)	2 (100)	3 (100)	3 (100)	3 (100)	9c (47.4)	0.001
		ybtA	59 (79.7)	11 (100)	9 (100)	5 (83.3)	4 (100)	2c (28.6)	4 (100)	3 (100)	2 (100)	3 (100)	3 (100)	3 (100)	10c (52.6)	0.002
		ybtE	59 (79.7)	11 (100)	9 (100)	5 (83.3)	4 (100)	2c (28.6)	4 (100)	3 (100)	2 (100)	3 (100)	3 (100)	3 (100)	10c (52.6)	0.002
		ybtP	59 (79.7)	11 (100)	9 (100)	5 (83.3)	4 (100)	2c (28.6)	4 (100)	3 (100)	2 (100)	3 (100)	3 (100)	3 (100)	10c (52.6)	0.002
		ybtQ	59 (79.7)	11 (100)	9 (100)	5 (83.3)	4 (100)	2c (28.6)	4 (100)	3 (100)	2 (100)	3 (100)	3 (100)	3 (100)	10c (52.6)	0.002
		ybtS	59 (79.7)	11 (100)	9 (100)	5 (83.3)	4 (100)	2c (28.6)	4 (100)	3 (100)	2 (100)	3 (100)	3 (100)	3 (100)	10c (52.6)	0.002
		ybtT	59 (79.7)	11 (100)	9 (100)	5 (83.3)	4 (100)	2c (28.6)	4 (100)	3 (100)	2 (100)	3 (100)	3 (100)	3 (100)	10c (52.6)	0.002
		ybtU	59 (79.7)	11 (100)	9 (100)	5 (83.3)	4 (100)	2c (28.6)	4 (100)	3 (100)	2 (100)	3 (100)	3 (100)	3 (100)	10c (52.6)	0.002
		ybtX	59 (79.7)	11 (100)	9 (100)	5 (83.3)	4 (100)	2c (28.6)	4 (100)	3 (100)	2 (100)	3 (100)	3 (100)	3 (100)	10c (52.6)	0.002
Secretion system	T3SS	espL1	41 (55.4)	0c	0c	6 (100)	4 (100)	7c (100)	0	3 (100)	2 (100)	0	3 (100)	0	16c (84.2)	< 0.001
		espL4	28 (37.8)	0c	0c	5 (83.3)	4c (100)	7c (100)	0	3 (100)	2 (100)	0	0	0	7 (36.8)	< 0.001
		espR1	19 (25.7)	0	0	6c (100)	0	0	0	3c (100)	2 (100)	0	3c (100)	0	5 (26.3)	< 0.001
		espX1	38 (51.4)	0c	0c	6c (100)	4 (100)	4 (57.1)	0	3 (100)	2 (100)	0	3 (100)	0	16c (84.2)	< 0.001
		espX4	41 (55.4)	0c	0c	6 (100)	4 (100)	7c (100)	0	3 (100)	2 (100)	0	3 (100)	0	16c (84.2)	< 0.001
		espX5	36 (48.6)	0c	0c	6c (100)	4 (100)	7c (100)	0	3 (100)	2 (100)	0	0	0	14c (73.7)	< 0.001
		espY1	32 (43.2)	0c	0c	6c (100)	4 (100)	6c (85.7)	0	3 (100)	2 (100)	0	3 (100)	0	8 (42.1)	< 0.001
		espY2	16 (21.6)	0	0	0	3c (75)	0	0	3c (100)	2c (100)	0	3c (100)	0	5 (26.3)	< 0.001
		espY3	19 (25.7)	0	0	6c (100)	4c (100)	0	0	3c (100)	2 (100)	0	0	0	4 (21.1)	< 0.001
		espY4	18 (24.3)	0	0	6c (100)	4c (100)	0	0	3c (100)	2 (100)	0	0	0	3 (15.8)	< 0.001
	T2SS	gspC	53 (71.6)	11 (100)	2c (22.2)	2 (33.3)	4 (100)	3 (42.9)	3 (75)	3 (100)	1 (50)	3 (100)	3 (100)	3 (100)	15 (78.9)	0.001
		gspD	55 (74.3)	11 (100)	2c (22.2)	2 (33.3)	4 (100)	5 (71.4)	3 (75)	3 (100)	1 (50)	3 (100)	3 (100)	3 (100)	15 (78.9)	0.002
		gspE	55 (74.3)	11 (100)	2c (22.2)	2 (33.3)	4 (100)	5 (71.4)	3 (75)	3 (100)	1 (50)	3 (100)	3 (100)	3 (100)	15 (78.9)	0.002
		gspF	55 (74.3)	11 (100)	2c (22.2)	2 (33.3)	4 (100)	5 (71.4)	3 (75)	3 (100)	1 (50)	3 (100)	3 (100)	3 (100)	15 (78.9)	0.002
		gspG	55 (74.3)	11 (100)	2c (22.2)	2 (33.3)	4 (100)	5 (71.4)	3 (75)	3 (100)	1 (50)	3 (100)	3 (100)	3 (100)	15 (78.9)	0.002
		gspH	55 (74.3)	11 (100)	2c (22.2)	2 (33.3)	4 (100)	5 (71.4)	3 (75)	3 (100)	1 (50)	3 (100)	3 (100)	3 (100)	15 (78.9)	0.002
		gspI	54 (73)	11 (100)	2c (22.2)	2 (33.3)	4 (100)	5 (71.4)	3 (75)	3 (100)	1 (50)	3 (100)	3 (100)	3 (100)	14 (73.7)	0.003
		gspJ	55 (74.3)	11 (100)	2c (22.2)	2 (33.3)	4 (100)	5 (71.4)	3 (75)	3 (100)	1 (50)	3 (100)	3 (100)	3 (100)	15 (78.9)	0.002
		gspK	56 (75.7)	11 (100)	2c (22.2)	2c (33.3)	4 (100)	5 (71.4)	3 (75)	3 (100)	1 (50)	3 (100)	3 (100)	3 (100)	16 (84.2)	0.001
		gspM	63 (85.1)	11 (100)	7 (77.8)	1c (16.7)	4 (100)	6 (85.7)	3 (75)	3 (100)	2 (100)	3 (100)	3 (100)	3 (100)	17 (89.5)	0.014
Toxin	alpha-Hemolysin	hlyA	12 (16.2)	0	5c (55.6)	0	1 (25)	1 (14.3)	0	0	0	0	0	3c (100)	2 (10.5)	0.002
		hlyB	12 (16.2)	0	5c (55.6)	0	1 (25)	1 (14.3)	0	0	0	0	0	3c (100)	2 (10.5)	0.002
		hlyC	12 (16.2)	0	5c (55.6)	0	1 (25)	1 (14.3)	0	0	0	0	0	3c (100)	2 (10.5)	0.002
		hlyD	12 (16.2)	0	5c (55.6)	0	1 (25)	1 (14.3)	0	0	0	0	0	3c (100)	2 (10.5)	0.002
	CNF-1	cnf1	10 (13.5)	0	5c (55.6)	0	0	0	0	0	0	0	0	3c (100)	2 (10.5)	0.001
	Colibactin	clbA	5 (6.8)	0	0	0	0	0	0	0	0	0	0	3c (100)	2 (10.5)	0.004
		clbB	5 (6.8)	0	0	0	0	0	0	0	0	0	0	3c (100)	2 (10.5)	0.004
		clbC	5 (6.8)	0	0	0	0	0	0	0	0	0	0	3c (100)	2 (10.5)	0.004
		clbD	5 (6.8)	0	0	0	0	0	0	0	0	0	0	3c (100)	2 (10.5)	0.004
		clbE	5 (6.8)	0	0	0	0	0	0	0	0	0	0	3c (100)	2 (10.5)	0.004
		clbF	5 (6.8)	0	0	0	0	0	0	0	0	0	0	3c (100)	2 (10.5)	0.004
		clbG	5 (6.8)	0	0	0	0	0	0	0	0	0	0	3c (100)	2 (10.5)	0.004
		clbH	5 (6.8)	0	0	0	0	0	0	0	0	0	0	3c (100)	2 (10.5)	0.004
		clbI	5 (6.8)	0	0	0	0	0	0	0	0	0	0	3c (100)	2 (10.5)	0.004
		clbK	5 (6.8)	0	0	0	0	0	0	0	0	0	0	3c (100)	2 (10.5)	0.004
		clbL	5 (6.8)	0	0	0	0	0	0	0	0	0	0	3c (100)	2 (10.5)	0.004
		clbM	5 (6.8)	0	0	0	0	0	0	0	0	0	0	3c (100)	2 (10.5)	0.004
		clbN	5 (6.8)	0	0	0	0	0	0	0	0	0	0	3c (100)	2 (10.5)	0.004
		clbO	5 (6.8)	0	0	0	0	0	0	0	0	0	0	3c (100)	2 (10.5)	0.004
		clbP	5 (6.8)	0	0	0	0	0	0	0	0	0	0	3c (100)	2 (10.5)	0.004
		clbQ	5 (6.8)	0	0	0	0	0	0	0	0	0	0	3c (100)	2 (10.5)	0.004
		clbS	5 (6.8)	0	0	0	0	0	0	0	0	0	0	3c (100)	2 (10.5)	0.004
	ShET2	senB	28 (37.8)	9c (81.8)	4 (44.4)	3 (50)	2 (50)	0	3 (75)	1 (33.3)	2 (100)	0	0	0	4 (21.1)	0.001
VF score, median (IQR)d			73 (62.8-80.3)	73 (73-75)	73 (69-76)	73.5 (65.8-83.3)	79 (77.3-89.8)	46c (44-65)	69.5 (63-73.8)	81 (78-85)e	(81-93)f	85c (83-86)e	63 (61-66)d	118c (115-120)e	66 (46-81)	< 0.001
aFor fimH-null isolates (isolates without fimH), MLST was performed according to the Achtman scheme using seven housekeeping genes (Wirth et al., 2006).
bPlease see the table S1 for details.
cP value was < 0.05 in comparison with all of the other isolates.
dARG and VF scores were defined as the number of unique ARG and VF detected for each isolate, respectively. IQR, interquartile range.
eMedian (min-max).
f(min-max).
